# Supplementary material for: Screening the 4f-electron spin of TbPc2 single-molecule magnets on metal substrates by ligand channeling
Source: Royal Society of Chemistry journal article supplement (doi:10.1039/c9nr05873g), 2019-01-01
Supplement: c9nr05873g1.pdf [file c9nr05873g1.pdf]

## Supplementary Information

# Screening the 4f-electron spin of TbPc<sub>2</sub> on metal substrates by ligand channeling

*Rabei Barhoumi,<sup>1</sup> Anis Amokrane,<sup>1,†</sup> Svetlana Klyatskaya,<sup>2</sup> Mauro Boero,<sup>1</sup> Mario Ruben,<sup>2</sup> and  
Jean-Pierre Bucher<sup>1\*</sup>*

<sup>1</sup>Université de Strasbourg, CNRS, IPCMS UMR 7504, F-67034 Strasbourg, France;

<sup>2</sup>Karlsruher Institut für Technologie, Institut für Nanotechnologie, D-76344 Eggenstein-  
Leopoldshafen

Keywords: Single molecule magnets, Kondo effect, scanning tunneling microscopy, spintronics,  
4f-electron magnetism, quantum mechanical entanglement, metal-organic interface.

† Present address: Department of Physical Science and Engineering, Nagoya University,  
Japan.

\*E-mail: [jean-pierre.bucher@ipcms.unistra.fr](mailto:jean-pierre.bucher@ipcms.unistra.fr)

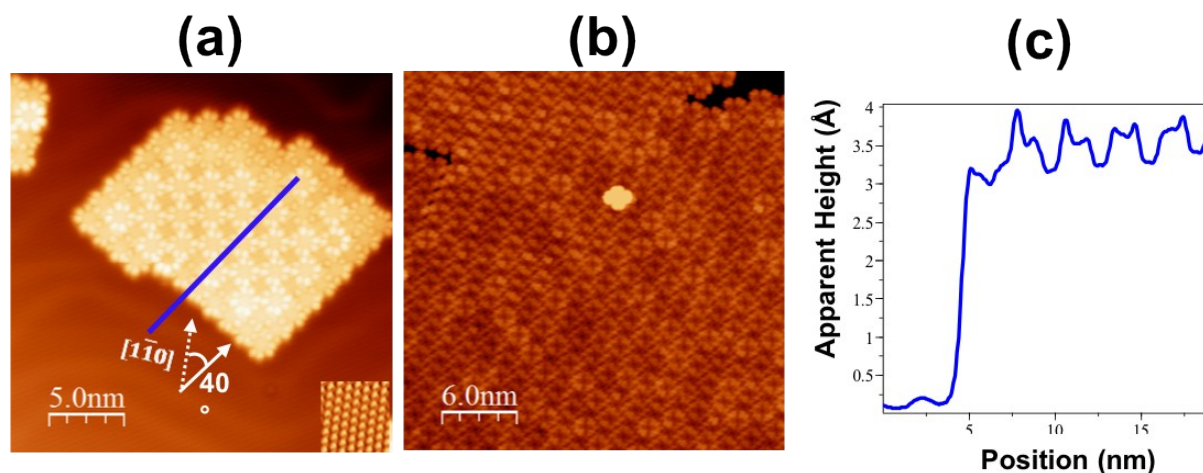

**Figure S1.** STM images of YPC<sub>2</sub> grown on Au(111). (a) Domain of Phase I ( $V_S = -1.0$  V,  $I_T = 80$  pA). The molecule orientation makes an angle of  $40^\circ$  with respect to the  $[110]$  direction of the Au substrate (inset:  $2$  nm  $\times$   $2$  nm;  $V_S = -0.2$  V,  $I_T = 100$  pA); (b) Domain of Phase II ( $V_S = -0.7$  V,  $I_T = 70$  pA). (c) Topographic line scan across the monolayer island, blue line in (a), its apparent height is  $0.35$  nm.

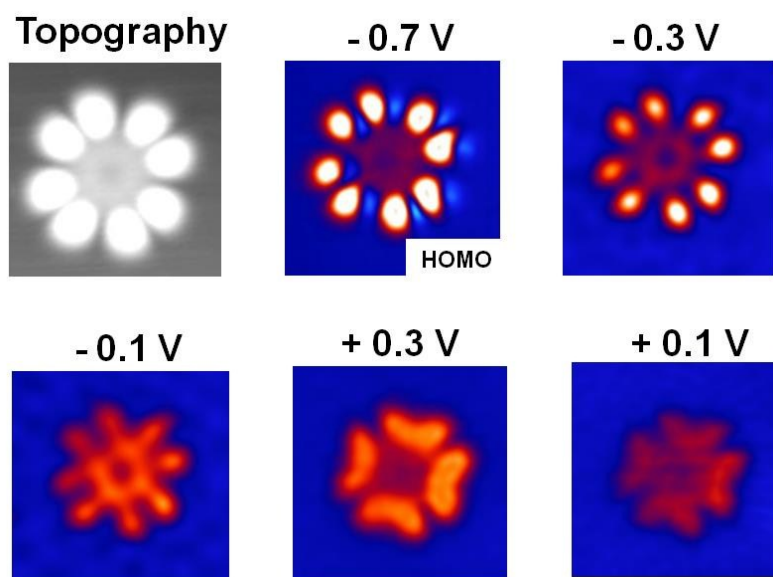

**Figure S2.** Constant height differential conductance maps at an isolated TbPc<sub>2</sub> molecule on Ag(111). Eight lobes are clearly visible at negative polarity, whereas a boomerang shape is obtained at positive bias. Set point parameters are:  $V_S = 0.40$  V and  $I_T = 0.70$  nA.
